# Supplementary material for: Genome-wide analysis in Escherichia coli unravels a high level of genetic homoplasy associated with cefotaxime resistance
Source: PubMed Central journal article supplement — Microb Genom. 2021 Apr 12;7(4):000556. doi: 10.1099/mgen.0.000556 (PMC8208684; doi:10.1099/mgen.0.000556), 2021-04-12
Supplement: mgen-7-0556-s001.pdf [file mgen-7-0556-s001.pdf]

**FIG S1** Violin plots of the  $\log_{10}$  Consistency Indexes of the genome, promoter, and attenuator SNP positions.

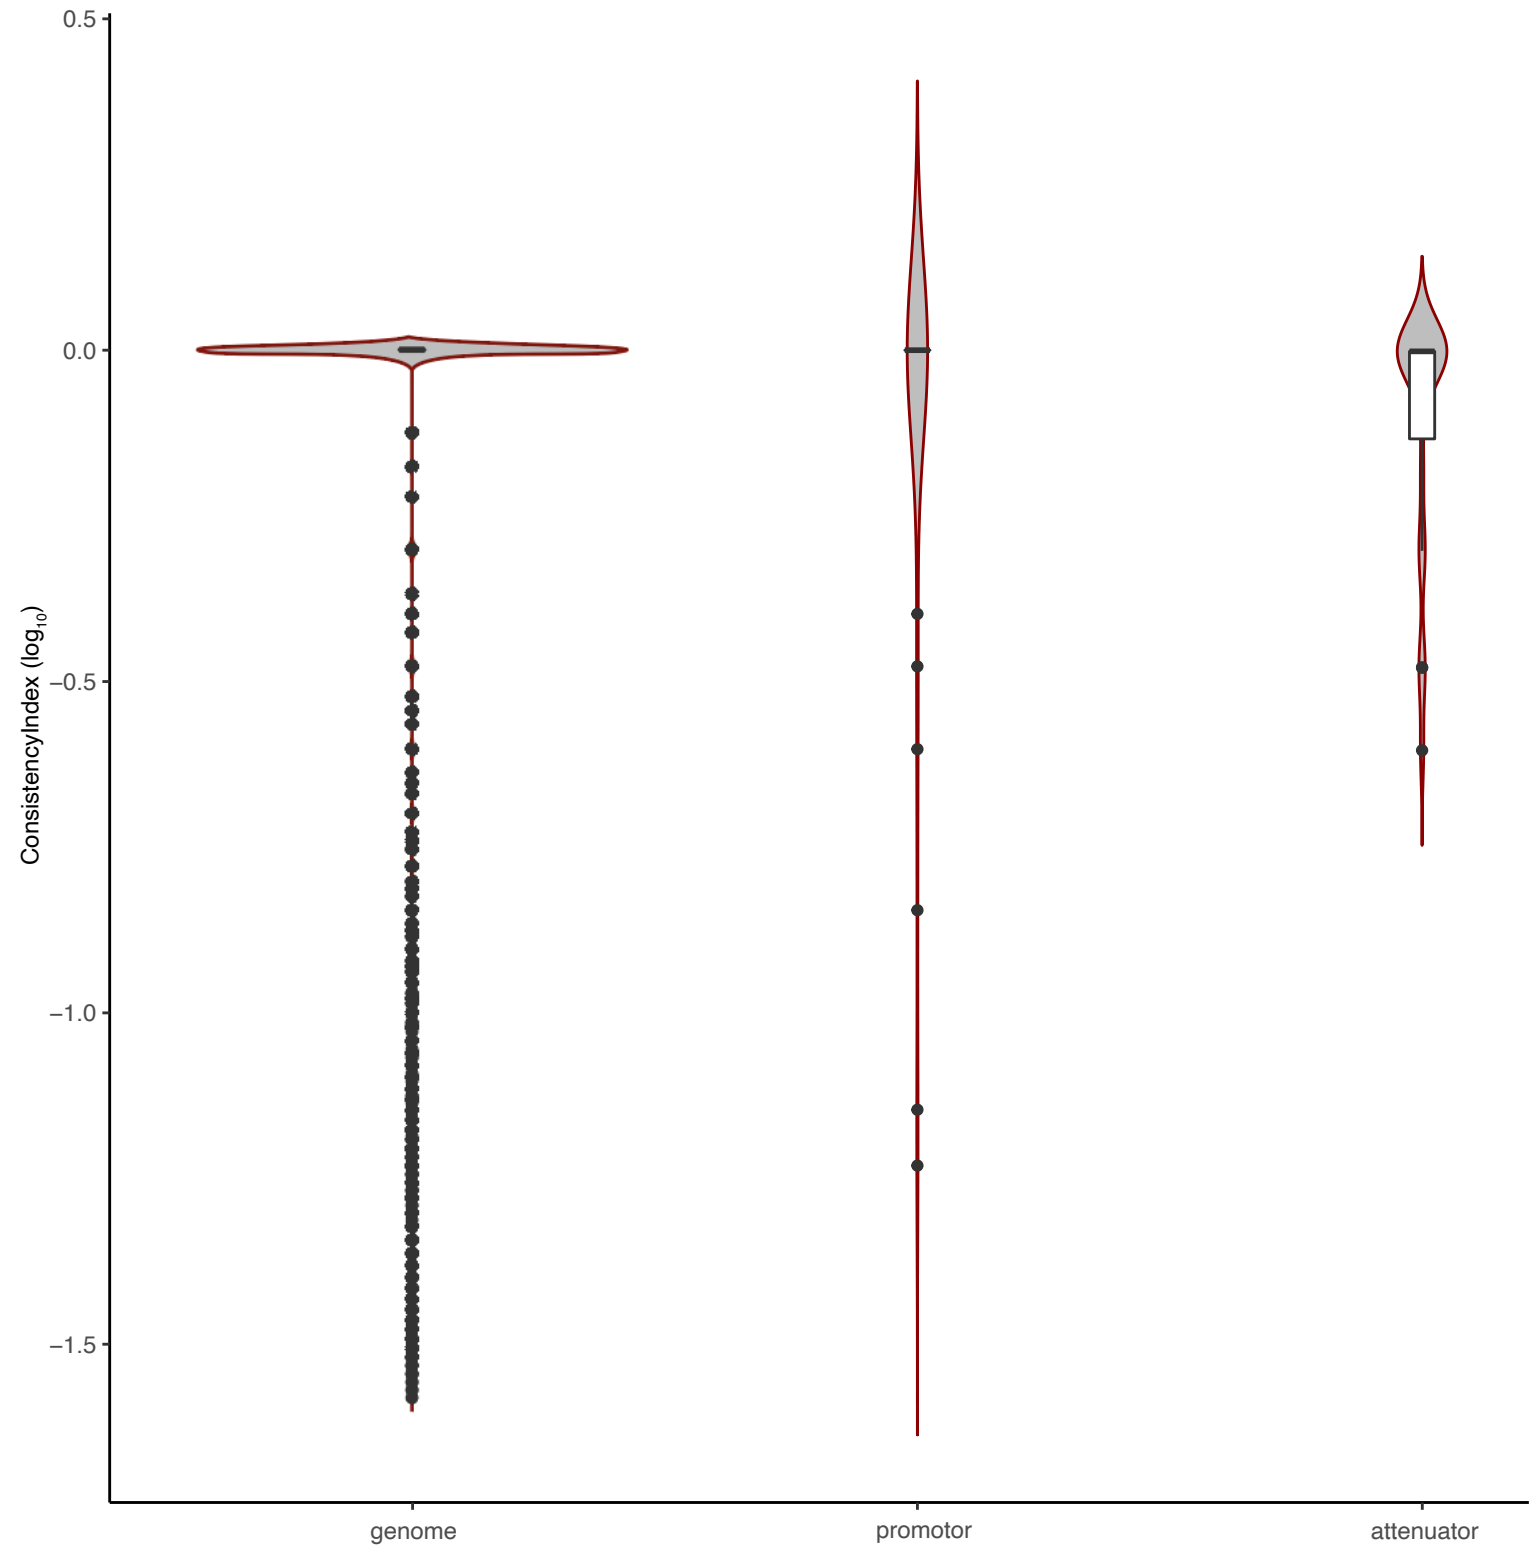

**FIG S2** Distribution of the  $\log_{10}$  Consistency Indexes of all genomic SNP positions based on the *E. coli* ampC\_0069 reference chromosome, compared to the  $\log_{10}$  Consistency Indexes of the promoter and attenuator region.

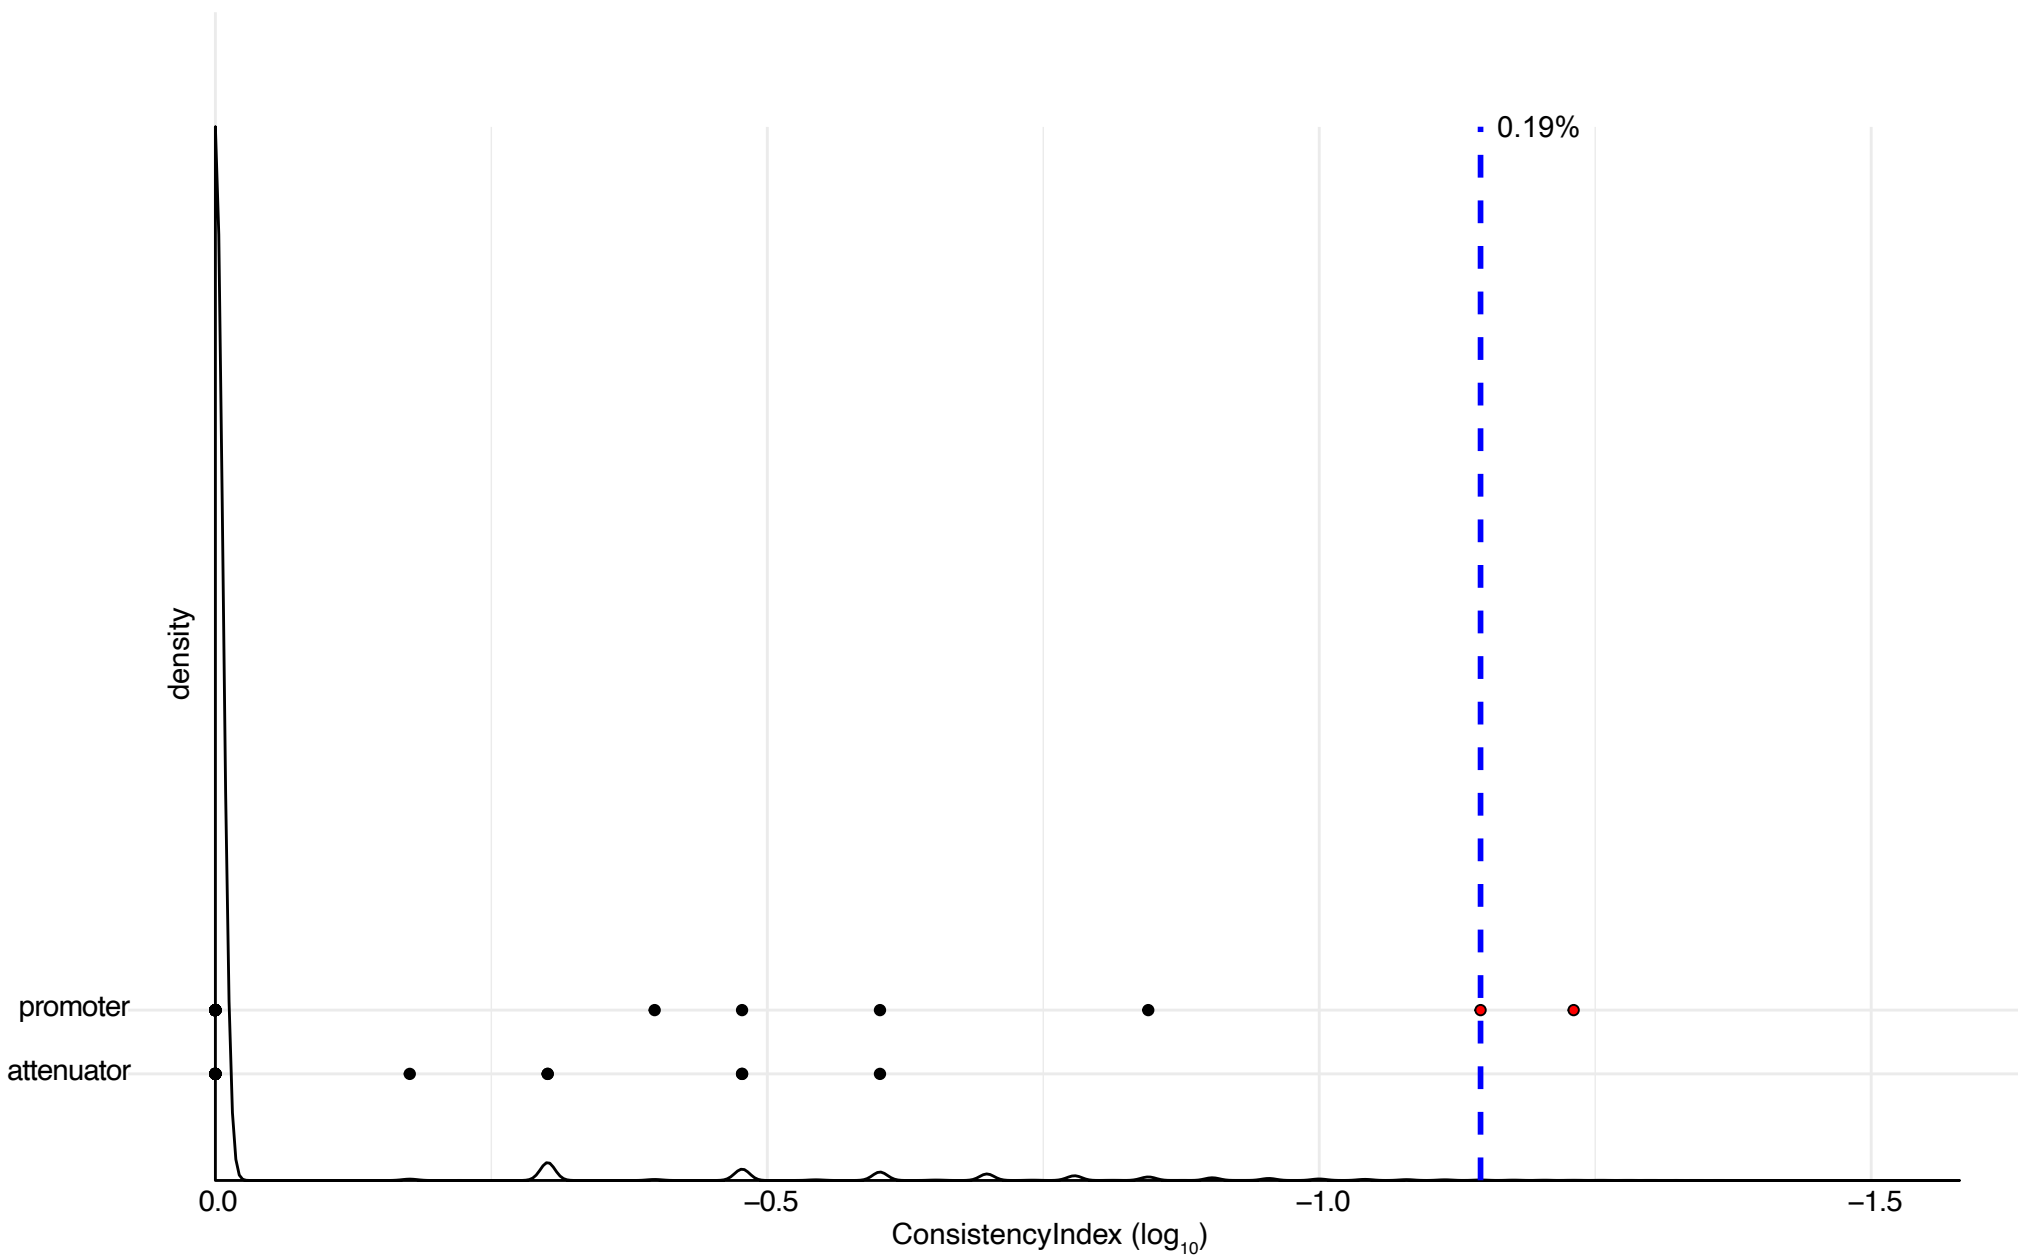

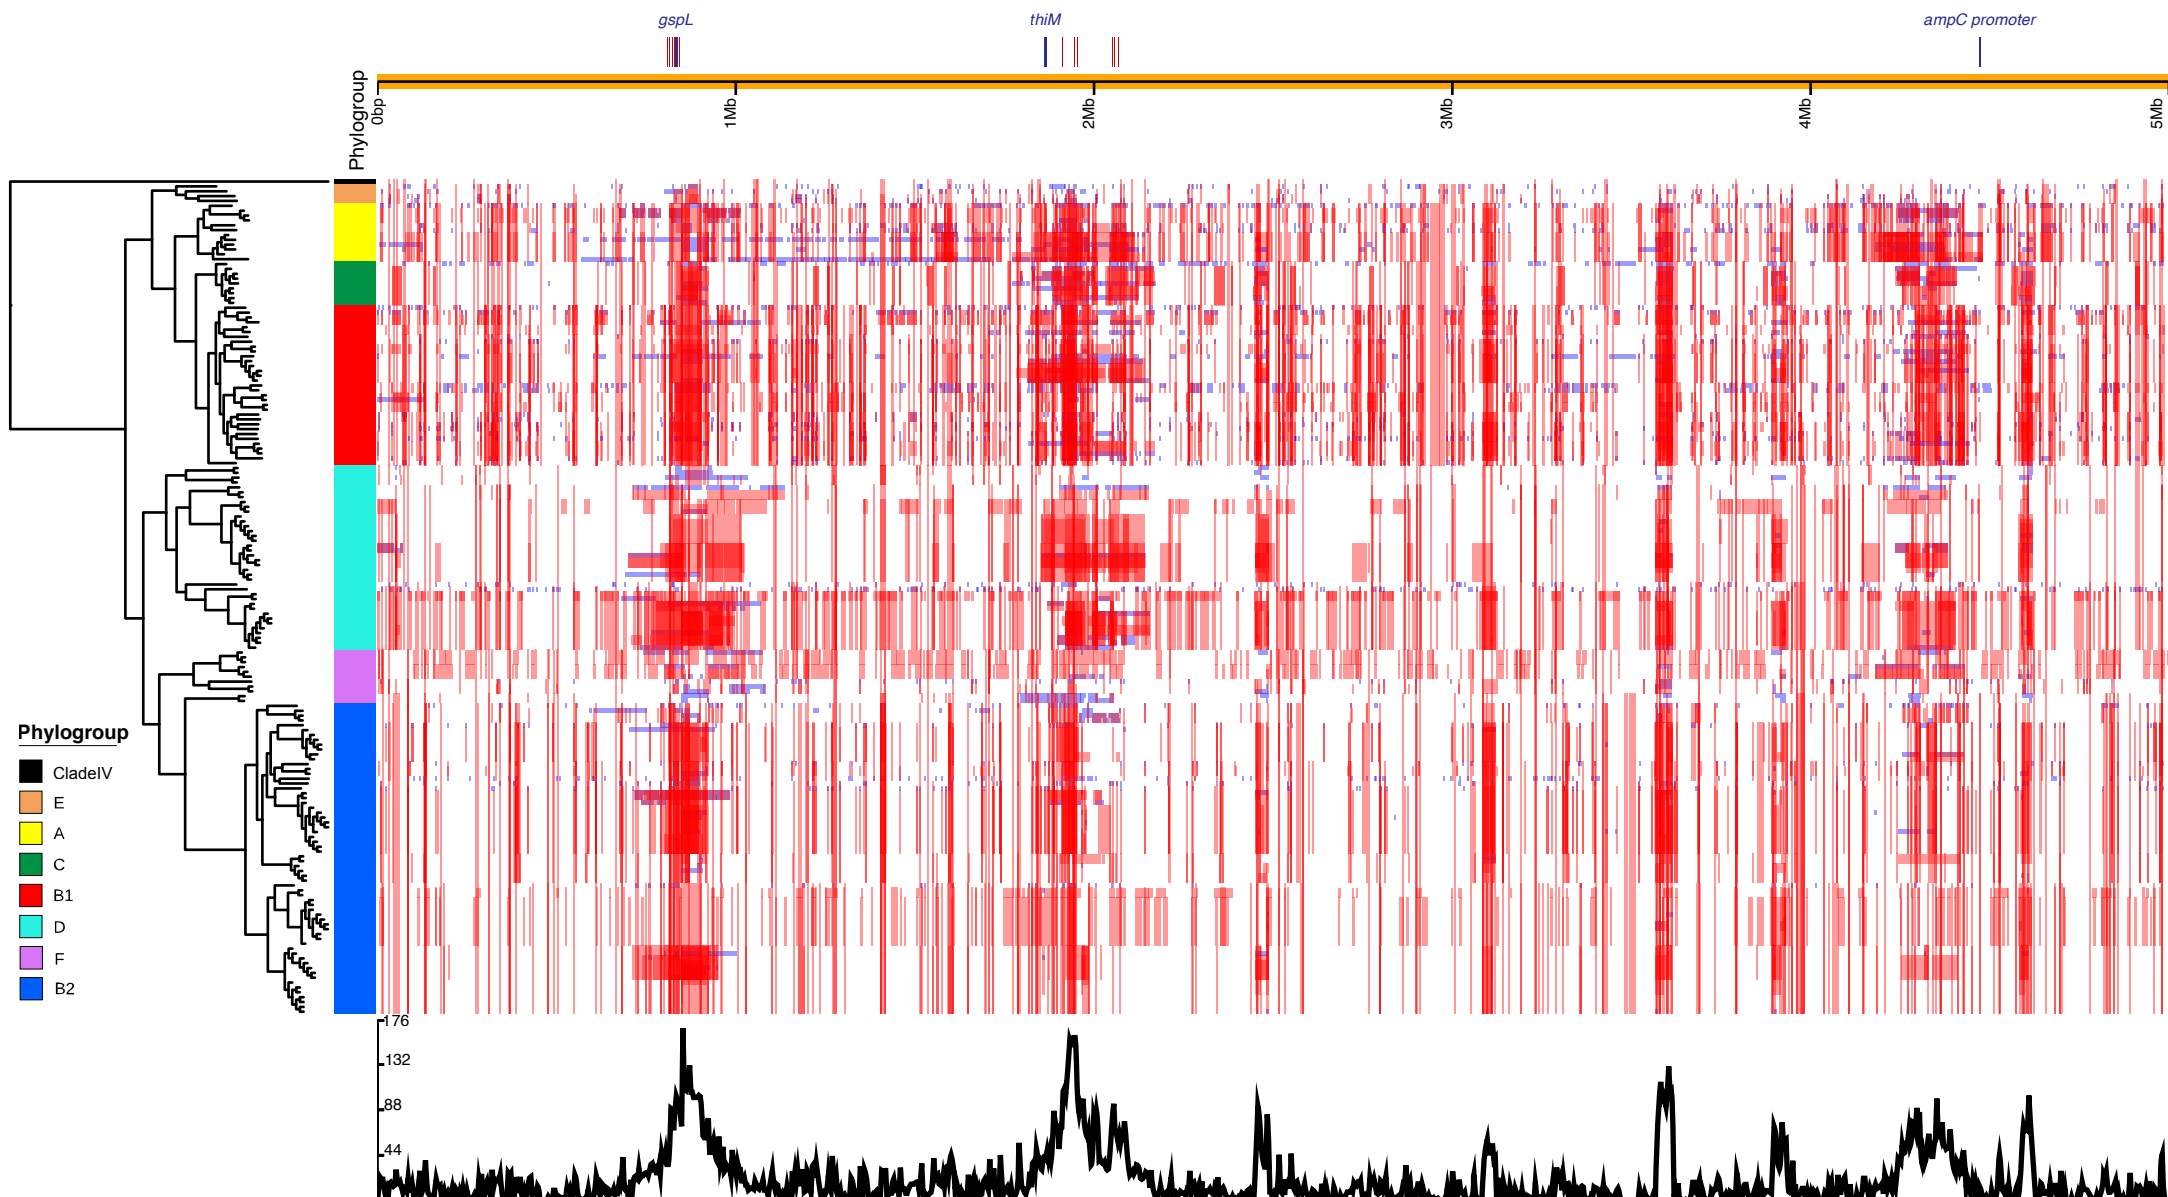

**FIG S3** Recombination events inferred from all 172 *E. coli* isolates by Gubbins displayed along the approximately maximum-likelihood phylogenetic tree based on the coreSNP alignment. Phylogroups are depicted as in FIG 2. Gubbins blocks are coloured red if they are ancestral, and blue if they only affect one isolate. The line graph represents the recombination prevalence along the sequence. The 24 positions with a significant association with cefotaxime resistance ( $FDR \leq 0.05$ ) and a consistency index  $\leq 0.05882353$  are indicated on the top of the figure. The two missense mutations and *ampC* promoter region are displayed in blue.
